# Supplementary material
Source: PubMed Central journal article supplement (PMC4784751)
Supplement: reic021797.ww1_default.pdf [file reic021797.ww1_default.pdf]

## Reference list for table 1 (pain assessment tools)

1. Cleeland CS, Ryan KM. Pain assessment: global use of the Brief Pain Inventory. *Ann Acad Med Singapore* 1994;23:129–38.
2. Ferrell BA, Stein WM, Beck J. The Geriatric Pain Measure: validity, reliability and factor analysis. *J Am Geriatr Soc* 2000;48:1669–73.
3. Pollard C. Preliminary validity study of the pain disability index. *Percept Mot Skills* 1984;59:974.
4. Melzack R. The short-form McGill pain questionnaire. *Pain* 1987;30:191–7.
5. Amtmann DA, Cook KF, Jensen MP, Chen W-H, Choi SW, Revicki D, et al. Development of a PROMIS item bank to measure pain interference. *Pain* 2010;150:173–82.
6. Bellamy N. Pain assessment in osteoarthritis: experience with the WOMAC osteoarthritis index. *Semin Arthritis Rheum* 1989;18:14–7.
7. Roland M, Fairbank J. The Roland – Morris Disability Questionnaire and the Oswestry Disability Questionnaire. *Spine* 2000;25:3115–24.
8. Price DD, Bush FM, Long S, Harkins SW. A comparison of pain management characteristics of mechanical visual analogue and simple numerical rating scales. *Pain* 1994;56:217–26.
9. Jensen MP, Karoly P. Self-report scales and procedures for assessing pain in adults. In: Turk DC, Melzack R, editors. *Handbook of Pain Assessment*. New York: Guilford Press; 2011. p. 19–41.
10. Bieri D, Reeve RA, Champion GD, Addicoat L, Ziegler JB. The Faces Pain Scale for the self-assessment of the severity and pain experienced by children: development, initial validation, and preliminary investigation for ratio scale properties. *Pain* 1990;41:139–50.
11. Bennett M. The LANSS Pain Scale: the Leeds assessment of neuropathic symptoms and signs. *Pain* 2001;92:147–57.
12. Bouhassira D, Attal N, Alchaar H, Boureau F, Biureau F, Brochet B, et al. Comparison of pain syndromes associated with nervous or somatic lesions and development of a new neuropathic pain diagnostic questionnaire (DN4). *Pain* 2005;114:29–36.
